# Supplementary material for: PTH regulates osteogenesis and suppresses adipogenesis through Zfp467 in a feed-forward, PTH1R-cyclic AMP-dependent manner
Source: eLife journal article supplement (doi:10.7554/elife.83345), 2023-04-26
Supplement: supp [file Source data for Figure 3.xlsx]

## Sheet: Sheet1
	COBs-PTH1R
								BMSCs-PTH1R
	COBs-Actin							BMSCs-Actin
