# Supplementary material for: PTH regulates osteogenesis and suppresses adipogenesis through Zfp467 in a feed-forward, PTH1R-cyclic AMP-dependent manner
Source: eLife journal article supplement (doi:10.7554/elife.83345), 2023-04-26
Supplement: supp [file Source data for Figure 6.xlsx]

## Sheet: Sheet1
		A							D								E								G
																									p-IKKα/β
																	p-p105
																									IKKα
																	P50
																									p-p100
																	ACTIN
																	F								p100
																	NIK
																	ACTIN
